# Supplementary material for: Protocol for a systematic review and meta-analysis of minimal important differences for generic multiattribute utility instruments
Source: PubMed Central journal article supplement — BMJ Open. 2022 Oct 25;12(10):e062703. doi: 10.1136/bmjopen-2022-062703 (PMC9608522; doi:10.1136/bmjopen-2022-062703), 2022-10-25
Supplement: bmjopen-2022-062703supp001.pdf [file bmjopen-2022-062703supp001.pdf]

## APPENDIX – SEARCH STRATEGY

### Preface

The below search strategy will be applied to all databases. The following operators are to be applied in searches:

- Closed captions: used to retrieve exact matches to search phrases.
- Truncation operators: represented below by asterisks, allowed for suffixes and pluralisation of search terms.
- Wildcard operators: represented below by hashes, allowed for variable characters.

The only limit to be imposed on searches involves publication date, with only studies published between 1989 and the present being retrieved in searches. Additionally, Group 1 and Group 2 search terms, listed below, were combined using an ‘AND’ operator.

### Group 1. Words and phrases associated with “multi-attribute utility instrument”

“Multi-Attribute Utility Instrument\*” or “Multi Attribute Utility Instrument\*” or “Multiattribute Utility Instrument\*” or “Multiple-Attribute Utility Instrument\*” or “Multiple Attribute Utility Instrument\*” or “MAUI\*” or “Generic Utility Instrument\*” or “Generic Preference-Based Measure\*” or “Generic Preference Based Measure\*” or “AQoL-#D” or “Assessment Quality of Life” or “Assessment Quality-of-Life” or “EuroQoL” or “EQ-#D” or “HUI#” or “Health Utilities Index” or “QWB” or “Quality of Wellbeing” or “Quality of Well-Being” or “15-D” or “15 Dimension\*” or “15-Dimension\*” or “SF-6D” or “SF-12” or “SF-36” or “Short Form” or “Short-Form” or “EQ-5D-5L Psychosocial” or “EQ-5D-5L-Psychosocial” or “PROMIS” or “Patient-Reported Outcome Measurement Information System” or “Patient Reported Outcome Measurement Information System” or “Rosser-Kind Index” or “PROPr” or “PROMIS Preference” or “Quality of Life” or “Quality-of-Life” or “Preference-Based Health-Related Quality-of-Life” or “Preference Based Health Related Quality of Life” or “Preference-Based Health Related Quality of Life” or “Preference Based Health-Related Quality of Life” or “Preference Based Health Related Quality-of-Life” or “Preference-Based Health-Related Quality of Life” or “Preference Based Health-Related Quality-of-Life” or “Preference-Based Health Related Quality-of-Life” or “Health-Related Quality-of-Life” or “Health-Related Quality of Life” or “Health Related Quality-of-Life” or “Health Related Quality of Life” or “Disability Adjusted Life Years” or “Disability-Adjusted Life Years” or “Disability-Adjusted Life-Years” or “Quality Adjusted Life Years” or “Quality-Adjusted Life Years” or “Quality-Adjusted Life-Years” or “Health Adjusted Life Expectancy” or “Health-Adjusted Life Expectancy” or “Health-Related Life-Expectancy” or “Quality Adjusted Life Expectancy” or “Quality-Adjusted Life Expectancy” or “Quality-Adjusted Life-Expectancy” or “QALY\*” or “DALY\*” or “HALE\*” or “QALE”.

### Group 2. Phrases associated with “minimal important difference”

“Minimum Important Difference\*” or “Minimum Significant Difference\*” or “Minimum Observable Difference\*” or “Minimum Meaningful Difference\*” or “Minimum Clinical\* Important Difference\*” or “Minimum Clinical\* Significant Difference\*” or “Minimum Clinical\* Meaningful Difference\*” or “Minimum Clinical\* Observable Difference\*” or “Minimum Clinical\* Significant Difference\*” or “Minimum Clinical\* Meaningful Difference\*” or “Minimum Practical\* Observable Difference\*” or “Minimum Practical\* Significant Difference\*” or “Minimum Practical\* Important Difference\*” or “Minimal\* Important Difference\*” or “Minimal\* Significant Difference\*” or “Minimal\* Observable Difference\*” or “Minimal\* Meaningful Difference\*” or “Minimal\* Clinical\* Important Difference\*” or “Minimal\* Clinical\* Significant Difference\*” or “Minimal\* Clinical\* Meaningful Difference\*” or “Minimal\* Clinical\* Observable Difference\*” or “Minimal\* Practical\* Important Difference\*” or “Minimal\* Practical\* Significant Difference\*” or “Minimal\* Practical\* Observable Difference\*” or “Minimal\* Practical\* Meaningful Difference\*” or “Smallest Important Difference\*” or “Smallest Significant Difference\*” or “Smallest Observable Difference\*” or “Smallest Meaningful Difference\*” or “Smallest Clinical\* Important Difference\*” or “Smallest Clinical\* Significant Difference\*” or “Smallest Clinical\* Meaningful Difference\*” or “Smallest Clinical\* Observable Difference\*” or “Smallest Practical\* Observable Difference\*” or “Smallest Practical\* Significant Difference\*” or “Smallest Practical\* Important Difference\*” or “Smallest Practical\* Meaningful Difference\*” or “Minimum Relevant Difference\*” or “Minimum Clinical\* Relevant Difference\*” or “Minimum Practical\* Relevant Difference\*” or “Minimal\* Relevant Difference\*” or “Minimal\* Clinical\* Relevant Difference\*” or “Minimal\* Practical\* Relevant Difference\*” or “Smallest Relevant Difference\*” or “Smallest Clinical\* Relevant Difference\*” or “Smallest Practical\* Relevant Difference\*” or “Minimum Important Change\*” or “Minimum Significant Change\*” or “Minimum Observable Change\*” or “Minimum Meaningful Change\*” or “Minimum Clinical\* Change\*” or “Minimum Clinical\* Significant Change\*” or “Minimum Clinical\* Meaningful Change\*” or “Minimum Clinical\* Observable Change\*” or “Minimum Practical\* Meaningful Change\*” or “Minimum Practical\* Observable Change\*” or “Minimum Practical\* Significant Change\*” or “Minimal\* Important Change\*” or “Minimal\* Significant Change\*” or “Minimal\* Observable Change\*” or “Minimal\* Meaningful Change\*” or “Minimal\* Clinical\* Important Change\*” or “Minimal\* Clinical\* Significant Change\*” or “Minimal\* Clinical\* Meaningful Change\*” or “Minimal\* Clinical\* Observable Change\*” or “Minimal\* Practical\* Important Change\*” or “Minimal\* Practical\* Significant Change\*” or “Minimal\* Practical\* Observable Change\*” or “Minimal\* Practical\* Meaningful Change\*” or “Smallest Important Change\*” or “Smallest Significant Change\*” or “Smallest Observable Change\*” or “Smallest Meaningful Change\*” or “Smallest Clinical\* Important Change\*” or “Smallest Clinical\* Significant Change\*” or “Smallest Clinical\* Meaningful Change\*” or “Smallest Clinical\* Observable Change\*” or “Smallest Practical\* Observable Change\*” or “Smallest Practical\* Significant Change\*” or “Smallest Practical\* Important Change\*” or “Smallest Practical\* Meaningful Change\*” or “Minimum Relevant Change\*” or “Minimum Clinical\* Relevant Change\*” or “Minimum Practical\* Relevant Change\*” or “Minimal\* Relevant Change\*” or “Minimal\* Clinical\* Relevant Change\*” or “Minimal\* Practical\* Relevant Change\*” or “Smallest Relevant Change\*” or “Smallest Clinical\* Relevant Change\*” or “Smallest Practical\* Relevant Change\*” or “Minimum Important Improvement\*” or “Minimum Significant Improvement\*” or “Minimum Observable Improvement\*” or “Minimum Meaningful Improvement\*” or “Minimum Clinical\* Improvement\*” or “Minimum Clinical\* Significant Improvement\*” or “Minimum Clinical\* Meaningful Improvement\*” or “Minimum Clinical\* Observable Improvement\*” or “Minimum Practical\* Meaningful Improvement\*” or “Minimum Practical\* Observable Improvement\*” or “Minimum
